**1691 Survey of Patient Attitudes Towards Face-To-Face and Telemedicine Teaching in the COVID-19 Era**

L. Coady<sup>1,2</sup>, A. Charturvedi<sup>1</sup>, N. Fearon<sup>2</sup>, H. Heneghan<sup>1,2</sup>,  
E. Carrington<sup>1,2,3</sup>

<sup>1</sup>Department of Surgery, University College Dublin, Dublin, Ireland, <sup>2</sup>Surgical Professorial Unit, St Vincent's University Hospital, Dublin, Ireland, <sup>3</sup>Department of Surgery & Cancer, Faculty of Medicine, Imperial College, London, United Kingdom

**Background:** COVID-19 has profoundly impacted the healthcare education environment and telemedicine has been used to augment face-to-face learning and support social-distancing. There is little evidence which examines how patients feel about participating in teaching with this technology.

**Method:** A prospective survey of 229 surgical inpatients/outpatients was conducted at a university hospital between August–September 2020. The survey consisted of 31 questions (7-point Likert scales, quantitative items, and free-text answers) to explore: general attitudes towards teaching, attitudes towards COVID-19, perceptions of face-to-face teaching and perceptions of telemedicine teaching. Relationships between demographics and areas of interest were analysed qualitatively and quantitatively.

**Results:** Patients reported a positive attitude towards both face-to-face (mean 5.5 [1.1SD]) and telemedicine teaching (5.4 [1.2]) however there was a preference for the face-to-face approach (mean difference [MD]=.16,  $p=0.14$ ). Face-to-face teaching was found to be less bothersome (MD=.32,  $p=.002$ ) and more rewarding (MD.33,  $p<.001$ ). Older patients were more likely to report both teaching techniques as embarrassing (face-to-face  $r=.16$ ,  $p=.048$ ; telemedicine  $r=.15$ ,  $p=.036$ ) or as an infringement on their privacy (face-to-face  $r=.13$ ,  $p=.048$ ; telemedicine  $r=.17$ ,  $p=.017$ ). Qualitative analyses revealed four themes of the patient experience: apprentice role of students, communication skills, transient need for telemedicine during COVID-19 and privacy concerns.

**Conclusions:** Despite reporting a favourable impression of telemedicine teaching, patients prefer traditional face-to-face styles as they find telemedicine more bothersome and less rewarding. Educators should take this into consideration during planning of teaching during the pandemic.
